# Supplementary figures and images for: Electron donor-acceptor interaction of anthracene with surface centers in decationized and dealuminized mordenities
Source: Royal Society of Chemistry journal article supplement (doi:10.1039/c7mt00069c), 1982-07-01

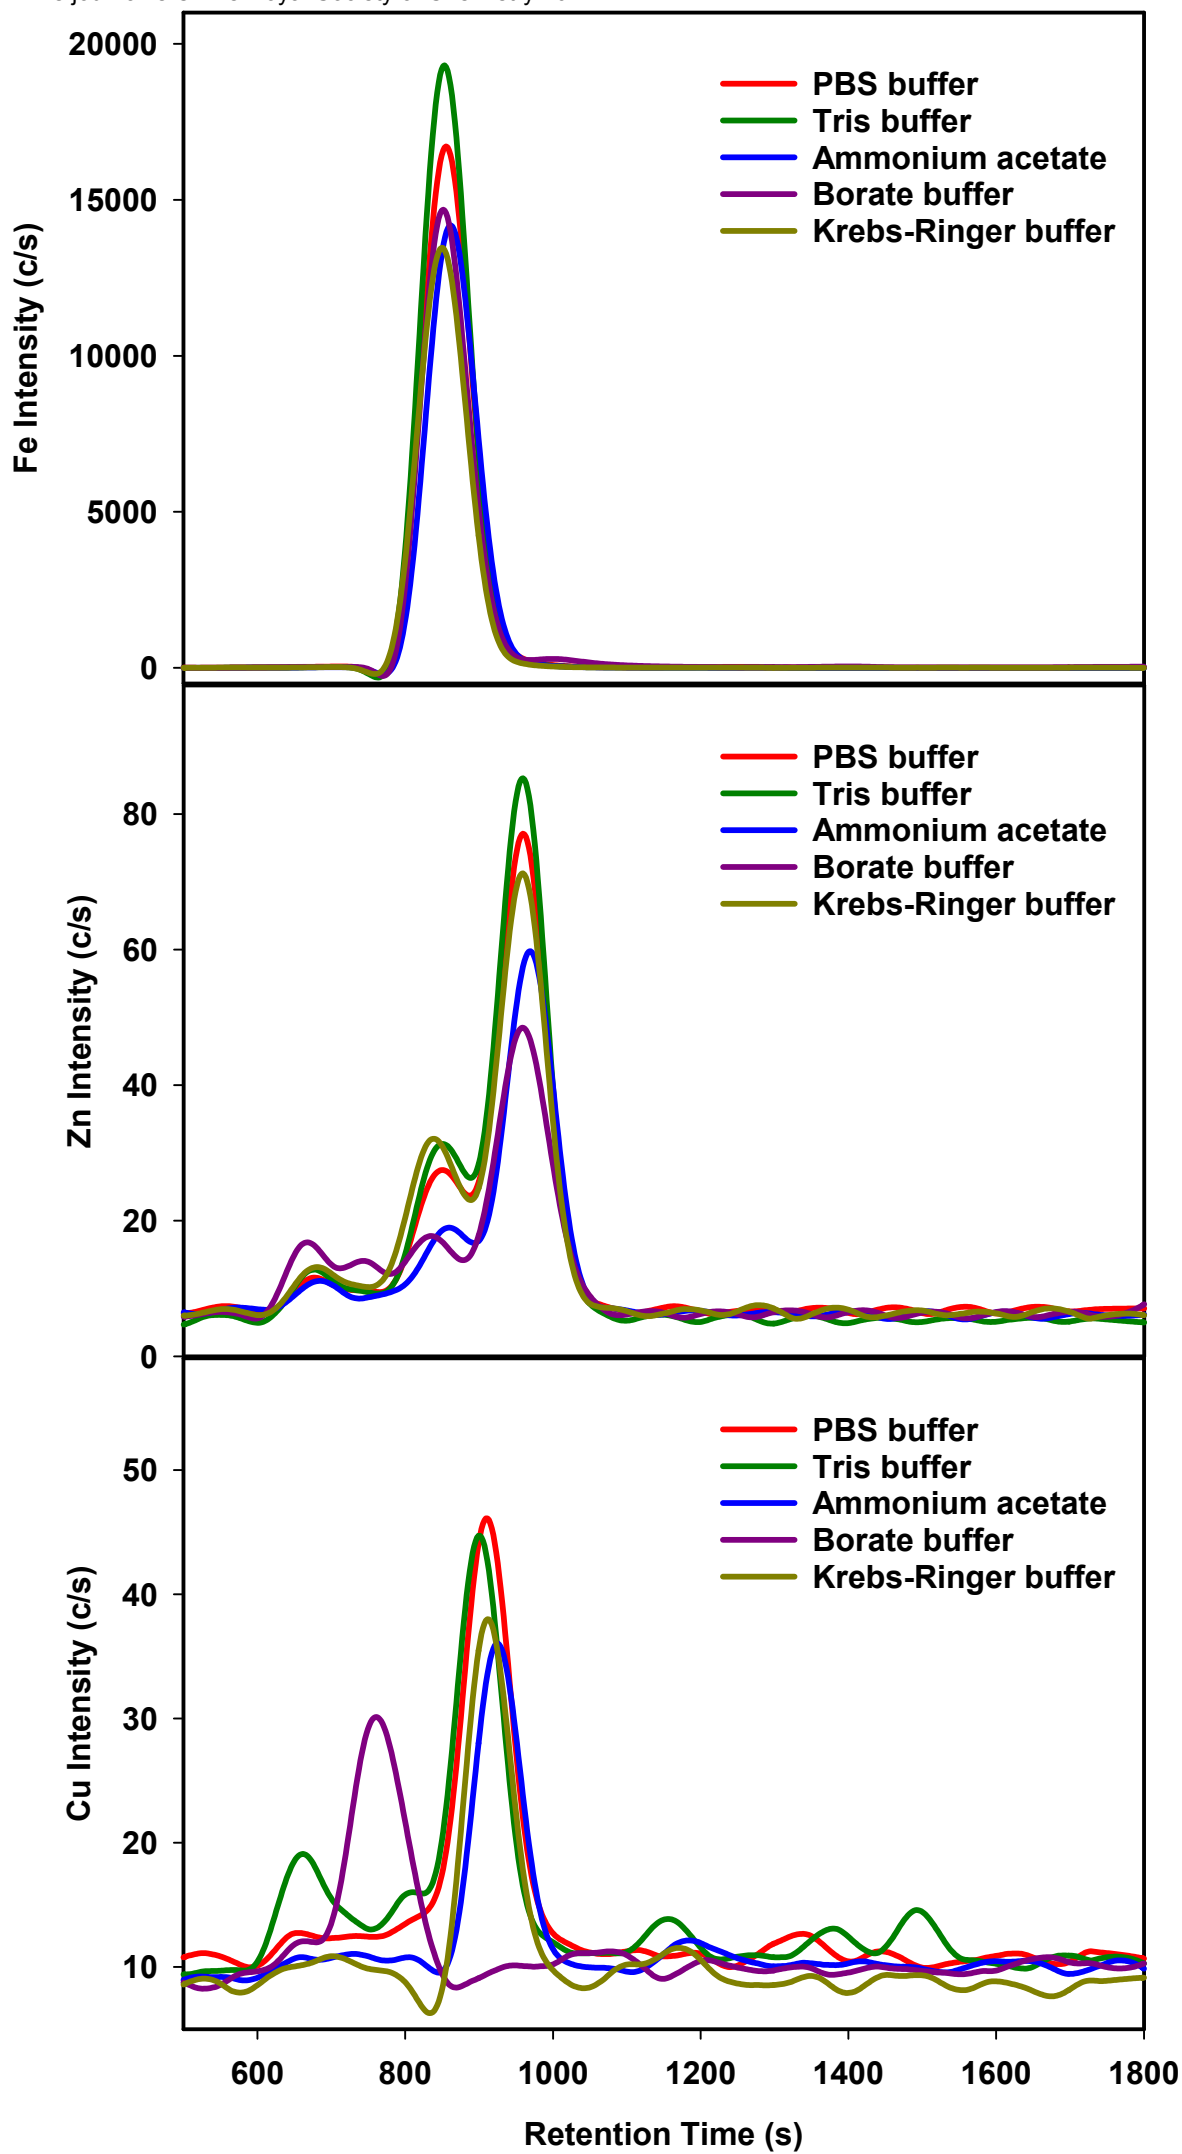

Supplement: c7mt00069c1.pdf [file c7mt00069c1.pdf]
